# Supplementary material for: The effect of interest and attitude on public comprehension of news with data visualization
Source: Frontiers journal article supplement (doi:10.3389/fcomm.2023.1064184), 2023-02-22
Supplement: Table_1.DOCX [file Table_1.DOCX]

Supplementary Table 1. Questionnaire

| **Pre-test** | | |
| --- | --- | --- |
| **Sociodemographic data** | - Age (18-24, 25-34, 35-49, 50-64 and more than 65 years) | |
| - Gender (male, female, other) | |
| - Autonomous community | |
| - Educational level   1. Primary studies (compulsory).  2. Secondary and/or high school studies.  3. Technical training studies (Vocational Training, cycle or training module).  4. University degree, diploma or degree studies.  5. Postgraduate university studies (Master or Doctorate). | |
| - Current job status   1. Inactive (retirement pensioner or dependent).  2. Unpaid domestic work.  3. Student.  4. Unemployed, unemployed.  5. Active worker. | |
| **Previous attitude**  **(0 = very negative –**  **10 = very positive)** | - In general terms, do you value big data as something positive or negative? | |
| - In general terms, do you value scientific news as something positive or negative? | |
| - In general terms, do you value news with data visualization as something positive or negative? | |
| **Previous interest**  **(1 = Not at all interested –**  **4 = Very interested)** | To what extent are you interested in the following topics?   - Traditional written news - Scientific news - News with data visualization | |
| **Previous comprehension**  **(1 = Strongly disagree –**  **5 = Strongly agree)** | - When I read a piece of news, I know what it is about. - I am able to deduce what a word or expression means from the information provided in the news. - I can perceive how the ideas or data in a piece of news are related. - I easily locate the explicit information (what, who, when, how, etc.) of a piece of news. - I am able to go beyond the literal understanding of the news. | |
| **Post-test** | | |
| **Interest**  **(1 = Not at all - 10 = A lot)** | | - The news I have read is interesting. - The news included information based on solutions. - The news reported a problem. |
| **Comprehension**  **(1 = Strongly disagree –**  **5 = Strongly agree)** | | - I have been able to identify what the news item I just read is about. - I have been able to deduce the meaning of some words or expressions from the information in the news. - I was able to perceive how the ideas or data in the news were related. - I easily located the explicit information (what, who, when, how, etc.) of the news. - I was able to go beyond the literal understanding of the news. |
| **Attitude**  **(1 = Strongly Disagree –**  **7 = Strongly Agree)** | | - There are many beneficial applications in news that use data visualization. - I am impressed by what can be done with data visualization. - Data visualization can have a positive impact on people's well-being. - Data visualization is exciting. - Data visualization can provide new solutions in journalism. - Data visualization can provide new economic opportunities for our country. - A large part of society will benefit in the future from the application of data visualization in journalism. - I am interested in using data visualization in my daily life. - Data visualization makes me proud of human ingenuity. - I would like to use data visualization in my own work. - Data visualization systems can help people to express themselves in a better way. - I love everything related to data visualization. |
