# Supplementary material for: The effect of interest and attitude on public comprehension of news with data visualization
Source: Frontiers journal article supplement (doi:10.3389/fcomm.2023.1064184), 2023-02-22
Supplement: Table_2.DOCX [file Table_2.DOCX]

Supplementary Table 2. Sociodemographic data

| **Sociodemographic data** |  |
| --- | --- |
|  |  |
| **Age** |  |
| 18-24 | 9.3% |
| 25-34 | 16.0% |
| 35-49 | 35.6% |
| 50-64 | 32.9% |
| More than 65 | 6.2% |
|  |  |
| **Gender** |  |
| Male | 48.9% |
| Female | 50.5% |
| Other | 0.6% |
|  |  |
| **Autonomous community** |  |
| Andalucía | 18.6% |
| Aragón | 1.4% |
| Principado de Asturias | 3.0% |
| Islas Balears | 0.7% |
| Canarias | 4.1% |
| Cantabria | 1.7% |
| Castilla y León | 6.2% |
| Castilla-La Mancha | 3.7% |
| Cataluña | 18.0% |
| Comunidad Valenciana | 10.3% |
| Extremadura | 1.8% |
| Galicia | 4.2% |
| Comunidad de Madrid | 16.6% |
| Región de Murcia | 2.1% |
| Comunidad Foral de Navarra | 1.0% |
| País Vasco | 5.9% |
| La Rioja | 0.7% |
| Ceuta | 0.1% |
|  |  |
| **Educational Level** |  |
| 1. Primary studies (mandatory). | 4.2% |
| 2. Secondary and/or high school studies. | 23.5% |
| 3. Technical training studies. | 24.8% |
| 4. University degree | 34.6% |
| 5. Postgraduate university studies (Master or PhD). | 12.9% |
|  |  |
| **Current job situation** |  |
| 1. Inactive (retirement pensioner or dependent). | 10.8% |
| 2. Unpaid domestic work. | 5.6% |
| 3. Student. | 7.5% |
| 4. Unemployed. | 13.9% |
| 5. Active worker. | 62.2% |
