# Supplementary material for: The effect of interest and attitude on public comprehension of news with data visualization
Source: Frontiers journal article supplement (doi:10.3389/fcomm.2023.1064184), 2023-02-22
Supplement: Table_3.DOCX [file Table_3.DOCX]

Supplementary Table 3. Descriptives

| **Pretest measures** | **Mean** | | **SD** | | ***t*** | ***p*** |  | **d** |  |
| --- | --- | --- | --- | --- | --- | --- | --- | --- | --- |
|  | Traditional | Visualization | Tradicional | Visualization |  |  |  |  |  |
| Interest | 3.09 | 3.13 | 0.62 | 0.60 | .941 | .173 |  | .61 |  |
| Attitude | 6.96 | 7.15 | 1.72 | 1.72 | 1.420 | .078 |  | 1.72 |  |
| Comprehension | 3.93 | 3.97 | 0.69 | 0.69 | .799 | .212 |  | .69 |  |
|  |  |  |  |  |  |  |  |  |  |
| **Postest measures** | **Mean** | | **SD** | | ***t*** | ***p*** |  | **d** |  |
|  | Traditional | Visualization | Tradicional | Visualization |  |  |  |  |  |
| Interest | 7.70 | 7.91 | 2.11 | 1.93 | 1.324 | .093 |  | 2.03 |  |
| Attitude | 5.06 | 5.11 | 1.09 | 1.04 | .634 | .263 |  | 1.06 |  |
| Comprehension | 3.71 | 3.95 | 0.83 | 0.75 | 4.035 | <.001 |  | .79 |  |

Note: Ntraditional = 374; Nvisualization = 326

Equal variances are assumed.
